# Supplementary material
Source: PubMed Central journal article supplement (PMC6931009)
Supplement: NIHMS1511902-supplement-Supplemental_Publication_Material.pdf [file NIHMS1511902-supplement-Supplemental_Publication_Material.pdf]

**Supplemental Table 1.** Aggregate complication rates based on timing of ICD placement from last HF hospitalization stratified by device type.

|                                        | Overall |                  | Patients Admitted for HF |                  | HF Admission ≤ 90 days |                  | HF Admission > 90 days or last HF admission unknown |                  | Adjusted p-value‡ |
|----------------------------------------|---------|------------------|--------------------------|------------------|------------------------|------------------|-----------------------------------------------------|------------------|-------------------|
| <b>Single Chamber</b>                  |         |                  |                          |                  |                        |                  |                                                     |                  |                   |
|                                        | #       | Rate (95% CI)    | #                        | Rate (95% CI)    | #                      | Rate (95% CI)    | #                                                   | Rate (95% CI)    |                   |
| <b>Periprocedural</b>                  |         |                  |                          |                  |                        |                  |                                                     |                  |                   |
| N                                      | 15,264  |                  | 1,851                    |                  | 1,089                  |                  | 12,342                                              |                  |                   |
| Any                                    | 142     | 0.93 (0.78-1.10) | 37                       | 2.00 (1.41-2.74) | 13                     | 1.19 (0.64-2.03) | 92                                                  | 0.75 (0.60-0.91) | <0.001            |
| <b>30-Day Complications</b>            |         |                  |                          |                  |                        |                  |                                                     |                  |                   |
| N*                                     | 14,137  |                  | 1,698                    |                  | 1,035                  |                  | 11,404                                              |                  |                   |
| Any complication                       | 228     | 1.61 (1.41-1.83) | 81                       | 4.77 (3.81-5.89) | 21                     | 2.03 (1.26-3.08) | 126                                                 | 1.10 (0.92-1.31) | <0.001            |
| Any complication requiring reoperation | 27      | 0.19 (0.13-0.28) | 7                        | 0.41 (0.17-0.85) | 1                      | 0.10 (0.00-0.54) | 19                                                  | 0.17 (0.10-0.26) | 0.149             |
| Any complication without reoperation   | 203     | 1.44 (1.25-1.65) | 75                       | 4.42 (3.49-5.51) | 20                     | 1.93 (1.18-2.97) | 108                                                 | 0.95 (0.78-1.14) | <.0001            |
| <b>90-Day Complications</b>            |         |                  |                          |                  |                        |                  |                                                     |                  |                   |
| N†                                     | 13,336  |                  | 1,601                    |                  | 969                    |                  | 10,766                                              |                  |                   |
| Any complication                       | 555     | 4.16 (3.83-4.51) | 115                      | 7.18 (5.97-8.56) | 54                     | 5.57 (4.21-7.21) | 386                                                 | 3.59 (3.24-3.95) | <0.001            |
| Any complication requiring reoperation | 229     | 1.72 (1.50-1.95) | 26                       | 1.62 (1.06-2.37) | 20                     | 2.06 (1.27-3.17) | 183                                                 | 1.70 (1.46-1.96) | 0.673             |
| Any complication without reoperation   | 354     | 2.65 (2.39-2.94) | 94                       | 5.87 (4.77-7.14) | 36                     | 3.72 (2.62-5.11) | 224                                                 | 2.08 (1.82-2.37) | <0.001            |
| <b>Dual Chamber</b>                    |         |                  |                          |                  |                        |                  |                                                     |                  |                   |
|                                        | #       | Rate (95% CI)    | #                        | Rate (95% CI)    | #                      | Rate (95% CI)    | #                                                   | Rate (95% CI)    |                   |
| <b>Periprocedural</b>                  |         |                  |                          |                  |                        |                  |                                                     |                  |                   |
| N                                      | 21,583  |                  | 2,844                    |                  | 1,389                  |                  | 17,350                                              |                  |                   |
| Any                                    | 280     | 1.3 (1.15-1.46)  | 68                       | 2.39 (1.86-3.02) | 21                     | 1.51 (0.94-2.3)  | 191                                                 | 1.1 (0.95-1.27)  | <0.001            |
| <b>30-Day Complications</b>            |         |                  |                          |                  |                        |                  |                                                     |                  |                   |
| N*                                     | 20,300  |                  | 2,671                    |                  | 1,327                  |                  | 16,302                                              |                  |                   |
| Any complication                       | 402     | 1.98 (1.79-2.18) | 145                      | 5.43 (4.60-6.36) | 43                     | 3.24 (2.35-4.34) | 214                                                 | 1.31 (1.14-1.50) | <0.001            |
| Any complication requiring reoperation | 51      | 0.25 (0.19-0.33) | 7                        | 0.26 (0.11-0.54) | 5                      | 0.38 (0.12-0.88) | 39                                                  | 0.24 (0.17-0.33) | 0.695             |
| Any complication without reoperation   | 353     | 1.74 (1.56-1.93) | 139                      | 5.20 (4.39-6.12) | 38                     | 2.86 (2.03-3.91) | 176                                                 | 1.08 (0.93-1.25) | <0.001            |
| <b>90-Day Complications</b>            |         |                  |                          |                  |                        |                  |                                                     |                  |                   |
| N†                                     | 19,357  |                  | 2,544                    |                  | 1,282                  |                  | 15,531                                              |                  |                   |

|                                        |          |                      |          |                      |          |                      |          |                      |        |
|----------------------------------------|----------|----------------------|----------|----------------------|----------|----------------------|----------|----------------------|--------|
| Any complication                       | 907      | 4.69 (4.39-4.99)     | 195      | 7.67 (6.66-8.77)     | 74       | 5.77 (4.56-7.19)     | 638      | 4.11 (3.80-4.43)     | <0.001 |
| Any complication requiring reoperation | 413      | 2.13 (1.93-2.35)     | 49       | 1.93 (1.43-2.54)     | 26       | 2.03 (1.33-2.96)     | 338      | 2.18 (1.95-2.42)     | 0.695  |
| Any complication without reoperation   | 533      | 2.75 (2.53-2.99)     | 149      | 5.86 (4.98-6.84)     | 52       | 4.06 (3.04-5.29)     | 332      | 2.14 (1.92-2.38)     | <0.001 |
| <b>CRT-D</b>                           |          |                      |          |                      |          |                      |          |                      |        |
|                                        | <b>#</b> | <b>Rate (95% CI)</b> |        |
| <b>Periprocedural</b>                  |          |                      |          |                      |          |                      |          |                      |        |
| N                                      | 44,209   |                      | 6,851    |                      | 3,765    |                      | 33,593   |                      |        |
| Any                                    | 772      | 1.75 (1.63-1.87)     | 196      | 2.86 (2.48-3.28)     | 73       | 1.94 (1.52-2.43)     | 503      | 1.50 (1.37-1.63)     | <0.001 |
| <b>30-Day Complications</b>            |          |                      |          |                      |          |                      |          |                      |        |
| N*                                     | 41,709   |                      | 6,406    |                      | 3,632    |                      | 31,671   |                      |        |
| Any complication                       | 978      | 2.34 (2.20-2.49)     | 339      | 5.29 (4.76-5.87)     | 134      | 3.69 (3.10-4.35)     | 505      | 1.59 (1.46-1.74)     | <0.001 |
| Any complication requiring reoperation | 131      | 0.31 (0.26-0.37)     | 24       | 0.37 (0.24-0.56)     | 13       | 0.36 (0.19-0.61)     | 94       | 0.30 (0.24-0.36)     | 0.528  |
| Any complication without reoperation   | 849      | 2.04 (1.90-2.18)     | 315      | 4.92 (4.40-5.48)     | 121      | 3.33 (2.77-3.97)     | 413      | 1.30 (1.18-1.44)     | <0.001 |
| <b>90-Day Complications</b>            |          |                      |          |                      |          |                      |          |                      |        |
| N†                                     | 39,805   |                      | 6,145    |                      | 3,470    |                      | 30,190   |                      |        |
| Any complication                       | 2297     | 5.77 (5.54-6.00)     | 488      | 7.94 (7.28-8.65)     | 230      | 6.63 (5.82-7.51)     | 1579     | 5.23 (4.98-5.49)     | <0.001 |
| Any complication requiring reoperation | 1280     | 3.22 (3.04-3.39)     | 183      | 2.98 (2.57-3.43)     | 97       | 2.80 (2.27-3.40)     | 1000     | 3.31 (3.11-3.52)     | 0.272  |
| Any complication without reoperation   | 1137     | 2.86 (2.69-3.02)     | 335      | 5.45 (4.90-6.05)     | 144      | 4.15 (3.51-4.87)     | 658      | 2.18 (2.02-2.35)     | <0.001 |

\*Patients with at least 1 month of FFS follow up

†Patients with at least 3 months of FFS follow up

‡Adjusted using the Holm procedure for multiple comparisons

**Abbreviations:** ICD = implantable cardioverter-defibrillation; HF = heart failure; N = number; CRT-D = cardiac resynchronization therapy-defibrillator.

**Supplemental Table 2.** Timing of ICD placement from last HF hospitalization and outcomes and interaction with device type.

| <b>Outcome</b>         | <b>p-value</b> |
|------------------------|----------------|
| <b>In Hospital</b>     |                |
| Any Adverse Event      | 0.820          |
| Mortality              | 0.576          |
| <b>30 Day Outcomes</b> |                |
| All-Cause Mortality    | 0.610          |
| All-Cause Readmissions | 0.098          |
| CV Readmissions        | 0.092          |
| <b>90 Day Outcomes</b> |                |
| All-Cause Mortality    | 0.682          |
| All-Cause Readmissions | 0.028          |
| CV Readmissions        | <0.001         |

**Abbreviations:** ICD = implantable cardioverter-defibrillation; HF = heart failure; CV = cardiovascular.

**Supplemental Table 3.** Multivariable adjusted odds ratios (95% confidence interval) between timing of ICD placement from last HF hospitalization and 90-day all-cause readmissions by device type.

| Outcome        | Group                      |                             |                                        | p-value     |             |             |
|----------------|----------------------------|-----------------------------|----------------------------------------|-------------|-------------|-------------|
|                | Currently Hospitalized (1) | Hospitalized ≤ 3 months (2) | Hospitalized > 3 months or unknown (3) | (1) vs. (3) | (2) vs. (3) | (1) vs. (2) |
| Single Chamber | 2.17 (1.94-2.44)           | 1.90 (1.64-2.20)            | 1                                      | <0.001      | <0.001      | 0.126       |
| Dual Chamber   | 1.86 (.68-2.06)            | 1.73 (1.52-1.96)            | 1                                      | <0.001      | <0.001      | 0.318       |
| CRT-D          | 1.83 (1.71-1.96)           | 1.57 (1.45-1.71)            | 1                                      | <0.001      | <0.001      | 0.002       |

**Abbreviations:** ICD = implantable cardioverter-defibrillation; HF = heart failure; CRT-D = cardiac resynchronization therapy-defibrillator.

**Supplemental Table 4.** Multivariable adjusted odds ratios (95% confidence interval) between timing of ICD placement from last HF hospitalization and 90-day CV readmissions by device type.

| Outcome        | Group                      |                             |                                        | p-value     |             |             |
|----------------|----------------------------|-----------------------------|----------------------------------------|-------------|-------------|-------------|
|                | Currently Hospitalized (1) | Hospitalized ≤ 3 months (2) | Hospitalized > 3 months or unknown (3) | (1) vs. (3) | (2) vs. (3) | (1) vs. (2) |
| Single Chamber | 3.02 (2.59-3.51)           | 2.39 (1.94-2.93)            | 1                                      | <0.001      | <0.001      | 0.035       |
| Dual Chamber   | 2.07 (1.81-2.36)           | 2.41 (2.05-2.82)            | 1                                      | <0.001      | <0.001      | 0.086       |
| CRT-D          | 2.16 (1.97-2.37)           | 1.98 (1.78-2.21)            | 1                                      | <0.001      | <0.001      | 0.164       |

**Abbreviations:** ICD = implantable cardioverter-defibrillation; HF = heart failure; CRT-D = cardiac resynchronization therapy-defibrillator.
